# Supplementary material for: Crystallization and molecular mobility in renewable semicrystalline copolymers based on polycaprolactone and polyisosorbide
Source: Royal Society of Chemistry journal article supplement (doi:10.1039/d2sm01198k), 2022-01-01
Supplement: d2sm01198k1.pdf [file d2sm01198k1.pdf]

# Supplementary Information

for

## **Crystallization and Molecular Mobility in Renewable Semicrystalline Copolymers based on Polycaprolactone and Polyisosorbide**

Chaima Bouyahya,<sup>a,b</sup> Nikolaos D. Bikiaris,<sup>a</sup> Alexandra Zamboulis,<sup>a</sup> Apostolos Kyritsis,<sup>c</sup>  
Mustapha Majdoub,<sup>b,\*</sup> Panagiotis A. Klonos,<sup>a,c,\*</sup>

<sup>a</sup> *Department of Chemistry, Laboratory of Polymer Chemistry and Technology, Aristotle University of Thessaloniki, GR-541 24, Thessaloniki, Greece*

<sup>b</sup> *Laboratoire des Interfaces et Matériaux Avancés, Université de Monastir, 5000 Monastir, Tunisia*

<sup>c</sup> *Department of Physics, National Technical University of Athens, Zografou Campus, 15780, Athens, Greece*

\* *Corresponding authors: pklonos@central.ntua.gr (P.A.K.); mustapha.majdoub@fsm.rnu.tn (M.M.)*

*(S1) POM time-temperature profile*

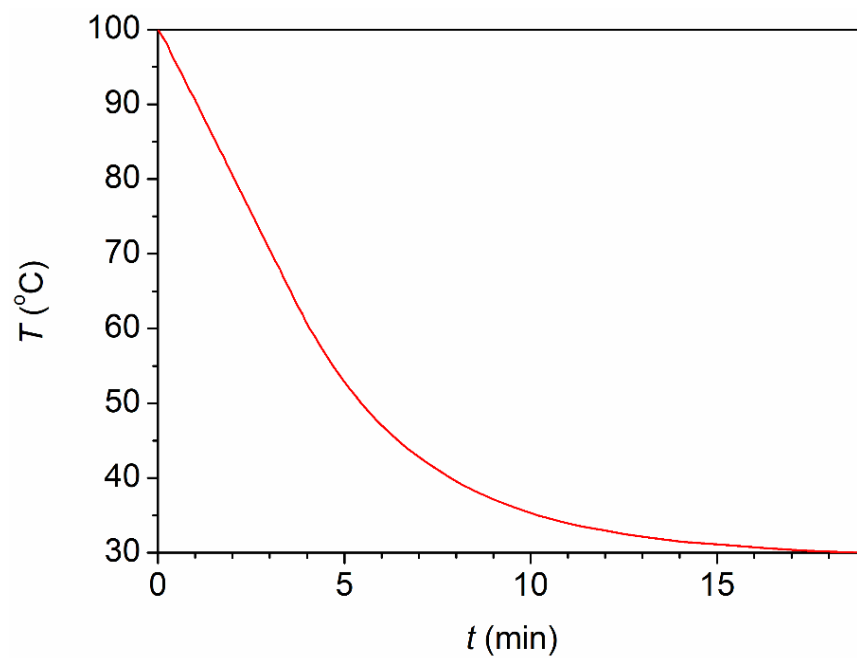

**Figure S1.** The time-temperature profile,  $T(t)$ , during cooling recorded for the POM measurements.

(S2) Examples of fitting of  $\epsilon''$  and  $\epsilon'$  at  $T > T_g$

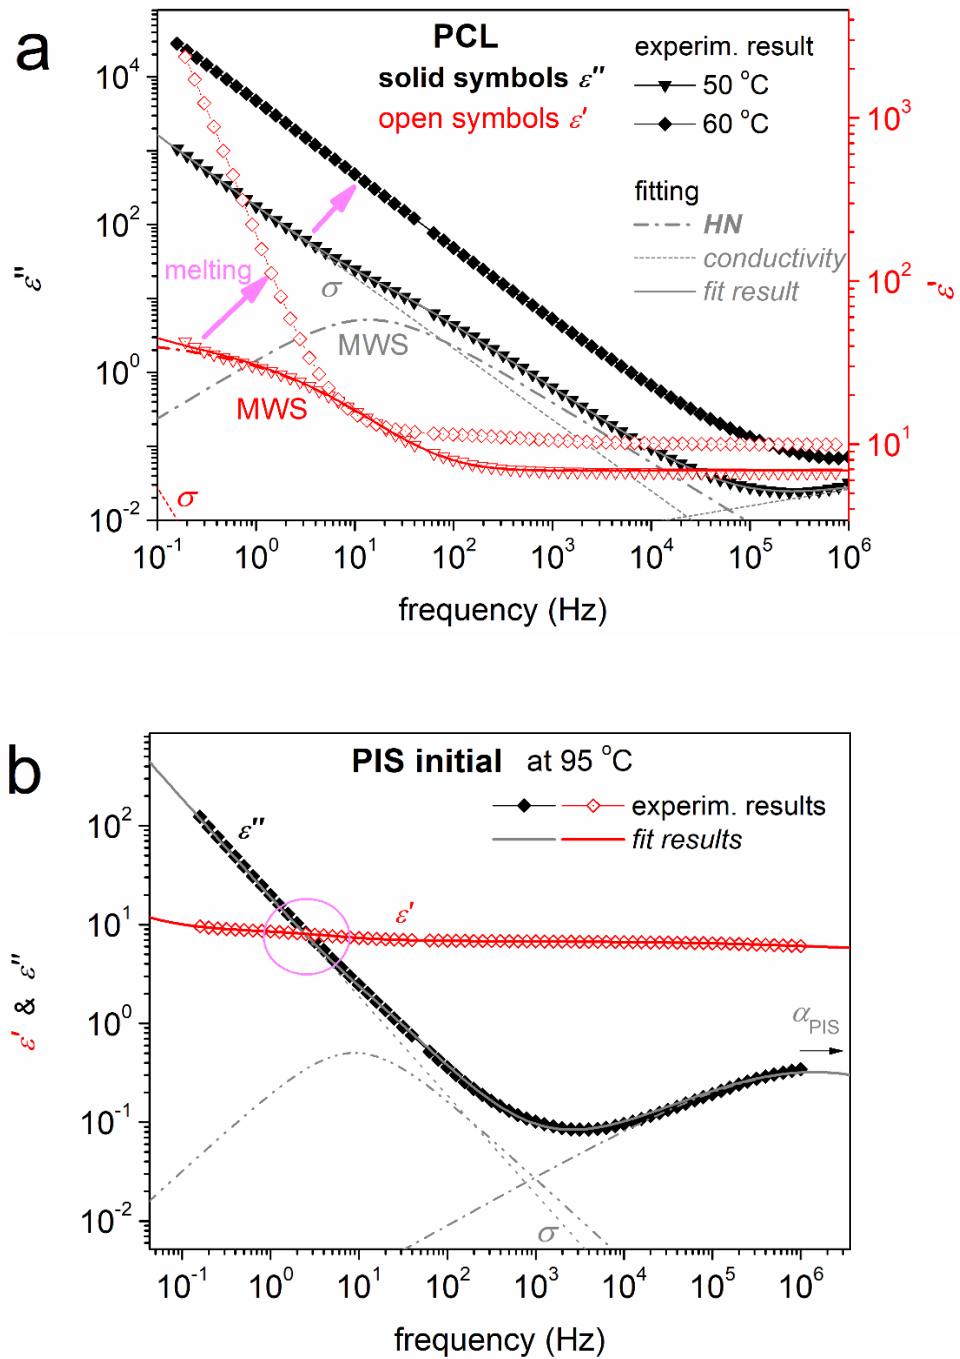

**Figure S2.** Examples of simultaneous fitting of  $\epsilon''$  and  $\epsilon'$  at  $T > T_g$  for (a) neat PCL at 50 °C and (b) initial PIS at 95 °C, to identify ionic conductivity and interfacial polarization phenomena. In (a), additional data at 60 °C are added, to compare the situation prior and above the melting of crystals, the corresponding effects being marked by the added arrows.
